# Supplementary material for: The ABCG2 multidrug transporter is a pump gated by a valve and an extracellular lid
Source: PubMed Central journal article supplement (PMC6883074; doi:10.1038/s41467-019-13302-2), 2019-11-28
Supplement: 41467_2019_13302_MOESM13_ESM.pdf [file 41467_2019_13302_MOESM13_ESM.pdf]

## Supplementary movie legends

### Title: Supplementary Movie 1

#### The di-leucine valve regulates water flow between central and upper cavities of WT ABCG2.

**Description:** (**Upper left panel**) The zoom-in of WT ABCG2 at the di-leucine valve (red) shows the side chains of L554 (light magenta), L555 (dark magenta), F431 (dark green) and M549 (light green). (**Upper middle panel**) The spatial water density shows water around the di-leucine valve and transport part of ABCG2. The map is the average of 3 parallel simulations using trajectories of 500 ns. (**Upper right panel**) The color scale of the spatial water density is shown for the upper middle panel. (**Lower left panel**) The zoom-in of WT ABCG2 at di-leucine valve with the same labelling in the upper left panel shows the water molecule (light blue). (**Lower middle panel**) The mean water displacement shows water dynamics around the valve and the transport path in ABCG2. The map is the average of 3 parallel simulations using trajectories of 500 ns. (**Lower right panel**) The color scale for the mean water displacement is shown for the lower middle panel.

### Title: Supplementary Movie 2

#### The di-leucine valve regulates water flow between central and upper cavities of L554A mutant.

**Description:** (**Upper left panel**) The zoom-in of L554A mutant at the valve (red) shows the side chains of L554A (light magenta), L555 (dark magenta), F431 (dark green) and M549 (light green). (**Upper middle panel**) The spatial water density shows water around the valve and transport part of ABCG2. The map is the average of 3 parallel simulations using trajectories of 150 ns. (**Upper right panel**) The color scale of the spatial water density is shown for the upper middle panel. (**Lower left panel**) The zoom-in of L554A mutant at the valve with the same labelling in the upper left panel shows the water molecule (light blue). (**Lower middle panel**) The mean water displacement shows water dynamics around the valve and the transport path in ABCG2. The map is the average of 3 parallel simulations using trajectories of 150 ns. (**Lower right panel**) The color scale for the mean water displacement is shown for the lower middle panel.

### Title: Supplementary Movie 3

#### The di-leucine valve regulates water flow between central and upper cavities of L554I mutant.

**Description:** (**Upper left panel**) The zoom-in of L554I mutant at the valve (red) shows the side chains of L554I (light magenta), L555 (dark magenta), F431 (dark green) and M549 (light green). (**Upper middle panel**) The spatial water density shows water around the valve and transport part of ABCG2. The map is the average of 3 parallel simulations using trajectories of 150 ns. (**Upper right panel**) The color scale of the spatial water density is shown for the upper middle panel. (**Lower left panel**) The zoom-in of L554I mutant at the valve with the same labelling in the upper left panel shows the water molecule (light blue). (**Lower middle panel**) The mean water displacement shows water dynamics around the valve and the transport path in ABCG2. The map is the average of 3 parallel simulations using trajectories of 150 ns. (**Lower right panel**) The color scale for the mean water displacement is shown for the lower middle panel.

### Title: Supplementary Movie 4

#### The di-leucine valve regulates water flow between central and upper cavities of L554C mutant.

**Description:** (**Upper left panel**) The zoom-in of L554C mutant at the valve (red) shows the side chains of L554C (light magenta), L555 (dark magenta), F431 (dark green) and M549 (light green). (**Upper middle panel**) The spatial water density shows water around the valve and transport part of ABCG2. The map is the average of 3 parallel simulations using trajectories of 150 ns. (**Upper right panel**) The color scale of the spatial water density is shown for the upper middle panel. (**Lower left panel**) The zoom-in of L554C mutant at the valve with the same labelling in the upper left panel shows the water molecule (light blue). (**Lower middle panel**) The mean water displacement shows water dynamics around the valve and the transport path in ABCG2. The map is the average of 3 parallel simulations using trajectories of 150 ns. (**Lower right panel**) The color scale for the mean water displacement is shown for the lower middle panel.

**Title: Supplementary Movie 5**

**The di-leucine valve regulates water flow between central and upper cavities of L555A mutant.**

**Description:** (**Upper left panel**) The zoom-in of L555A mutant at the valve (red) shows the side chains of L554 (light magenta), L555A (dark magenta), F431 (dark green) and M549 (light green). (**Upper middle panel**) The spatial water density shows water around the valve and transport part of ABCG2. The map is the average of 3 parallel simulations using trajectories of 150 ns. (**Upper right panel**) The color scale of the spatial water density is shown for the upper middle panel. (**Lower left panel**) The zoom-in of L555A mutant at the valve with the same labelling in the upper left panel shows the water molecule (light blue). (**Lower middle panel**) The mean water displacement shows water dynamics around the valve and the transport path in ABCG2. The map is the average of 3 parallel simulations using trajectories of 150 ns. (**Lower right panel**) The color scale for the mean water displacement is shown for the lower middle panel.

**Title: Supplementary Movie 6**

**The di-leucine valve regulates water flow between central and upper cavities of L555I mutant.**

**Description:** (**Upper left panel**) The zoom-in of L555I mutant at the valve (red) shows the side chains of L554 (light magenta), L555I (dark magenta), F431 (dark green) and M549 (light green). (**Upper middle panel**) The spatial water density shows water around the valve and transport part of ABCG2. The map is the average of 3 parallel simulations using trajectories of 150 ns. (**Upper right panel**) The color scale of the spatial water density is shown for the upper middle panel. (**Lower left panel**) The zoom-in of L555I mutant at the valve with the same labelling in the upper left panel shows the water molecule (light blue). (**Lower middle panel**) The mean water displacement shows water dynamics around the valve and the transport path in ABCG2. The map is the average of 3 parallel simulations using trajectories of 150 ns. (**Lower right panel**) The color scale for the mean water displacement is shown for the lower middle panel.

**Title: Supplementary Movie 7**

**The di-leucine valve regulates water flow between central and upper cavities of L555C mutant.**

**Description:** (**Upper left panel**) The zoom-in of L555C mutant at the valve (red) shows the side chains of L554 (light magenta), L555C (dark magenta), F431 (dark green) and M549 (light green). (**Upper middle panel**) The spatial water density shows water around the valve and transport part of ABCG2. The map is the average of 3 parallel simulations using trajectories of 150 ns. (**Upper right panel**) The color scale of the spatial water density is shown for the upper middle panel. (**Lower left panel**) The zoom-in of L555C mutant at the valve with the same labelling in the upper left panel shows the water molecule (light blue). (**Lower middle panel**) The mean water displacement shows water dynamics around the valve and the transport path in ABCG2. The map is the average of 3 parallel simulations

using trajectories of 150 ns. **(Lower right panel)** The color scale for the mean water displacement is shown for the lower middle panel.

#### **Title: Supplementary Movie 8**

**The di-leucine valve regulates water flow between central and upper cavities of L554A L555A double mutant.**

**Description: (Upper left panel)** The zoom-in of L554A L555A double mutant at the valve (red) shows the side chains of L554A (light magenta), L555A (dark magenta), F431 (dark green) and M549 (light green). **(Upper middle panel)** The spatial water density shows water around the valve and transport part of ABCG2. The map is the average of 3 parallel simulations using trajectories of 150 ns. **(Upper right panel)** The color scale of the spatial water density is shown for the upper middle panel. **(Lower left panel)** The zoom-in of L554A L555A double mutant at the valve with the same labelling in the upper left panel shows the water molecule (light blue). **(Lower middle panel)** The mean water displacement shows water dynamics around the valve and the transport path in ABCG2. The map is the average of 3 parallel simulations using trajectories of 150 ns. **(Lower right panel)** The color scale for the mean water displacement is shown for the lower middle panel.

#### **Title: Supplementary Movie 9**

**The di-leucine valve regulates water flow between central and upper cavities of L554I L555I double mutant.**

**Description: (Upper left panel)** The zoom-in of L554I L555I double mutant at the valve (red) shows the side chains of L554I (light magenta), L555I (dark magenta), F431 (dark green) and M549 (light green). **(Upper middle panel)** The spatial water density shows water around the valve and transport part of ABCG2. The map is the average of 3 parallel simulations using trajectories of 150 ns. **(Upper right panel)** The color scale of the spatial water density is shown for the upper middle panel. **(Lower left panel)** The zoom-in of L554I L555I double mutant at the valve with the same labelling in the upper left panel shows the water molecule (light blue). **(Lower middle panel)** The mean water displacement shows water dynamics around the valve and the transport path in ABCG2. The map is the average of 3 parallel simulations using trajectories of 150 ns. **(Lower right panel)** The color scale for the mean water displacement is shown for the lower middle panel.

#### **Title: Supplementary Movie 10**

**The di-leucine valve regulates water flow between central and upper cavities of L554C L555C double mutant.**

**Description: (Upper left panel)** The zoom-in of L554C L555C double mutant at the valve (red) shows the side chains of L554C (light magenta), L555C (dark magenta), F431 (dark green) and M549 (light green). **(Upper middle panel)** The spatial water density shows water around the valve and transport part of ABCG2. The map is the average of 3 parallel simulations using trajectories of 150 ns. **(Upper right panel)** The color scale of the spatial water density is shown for the upper middle panel. **(Lower left panel)** The zoom-in of L554C L555C double mutant at the valve with the same labelling in the upper left panel shows the water molecule (light blue). **(Lower middle panel)** The mean water displacement shows water dynamics around the valve and the transport path in ABCG2. The map is the average of 3 parallel simulations using trajectories of 150 ns. **(Lower right panel)** The color scale for the mean water displacement is shown for the lower middle panel.
